# Supplementary material for: Duration and ice thickness of a Late Holocene outlet glacier advance near Narsarsuaq, southern Greenland
Source: Copernicus journal article supplement (doi:10.5194/cp-19-1777-2023), 2023-09-08
Supplement: Supplementary file 1 [file cp-19-1777-2023-supplement.pdf]

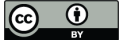

*Supplement of*

## **Duration and ice thickness of a Late Holocene outlet glacier advance near Narsarsuaq, southern Greenland**

**Peter J. K. Puleo and Yarrow Axford**

*Correspondence to:* Peter J. K. Puleo ([peterpuleo2024@u.northwestern.edu](mailto:peterpuleo2024@u.northwestern.edu))

The copyright of individual parts of the supplement might differ from the article licence.

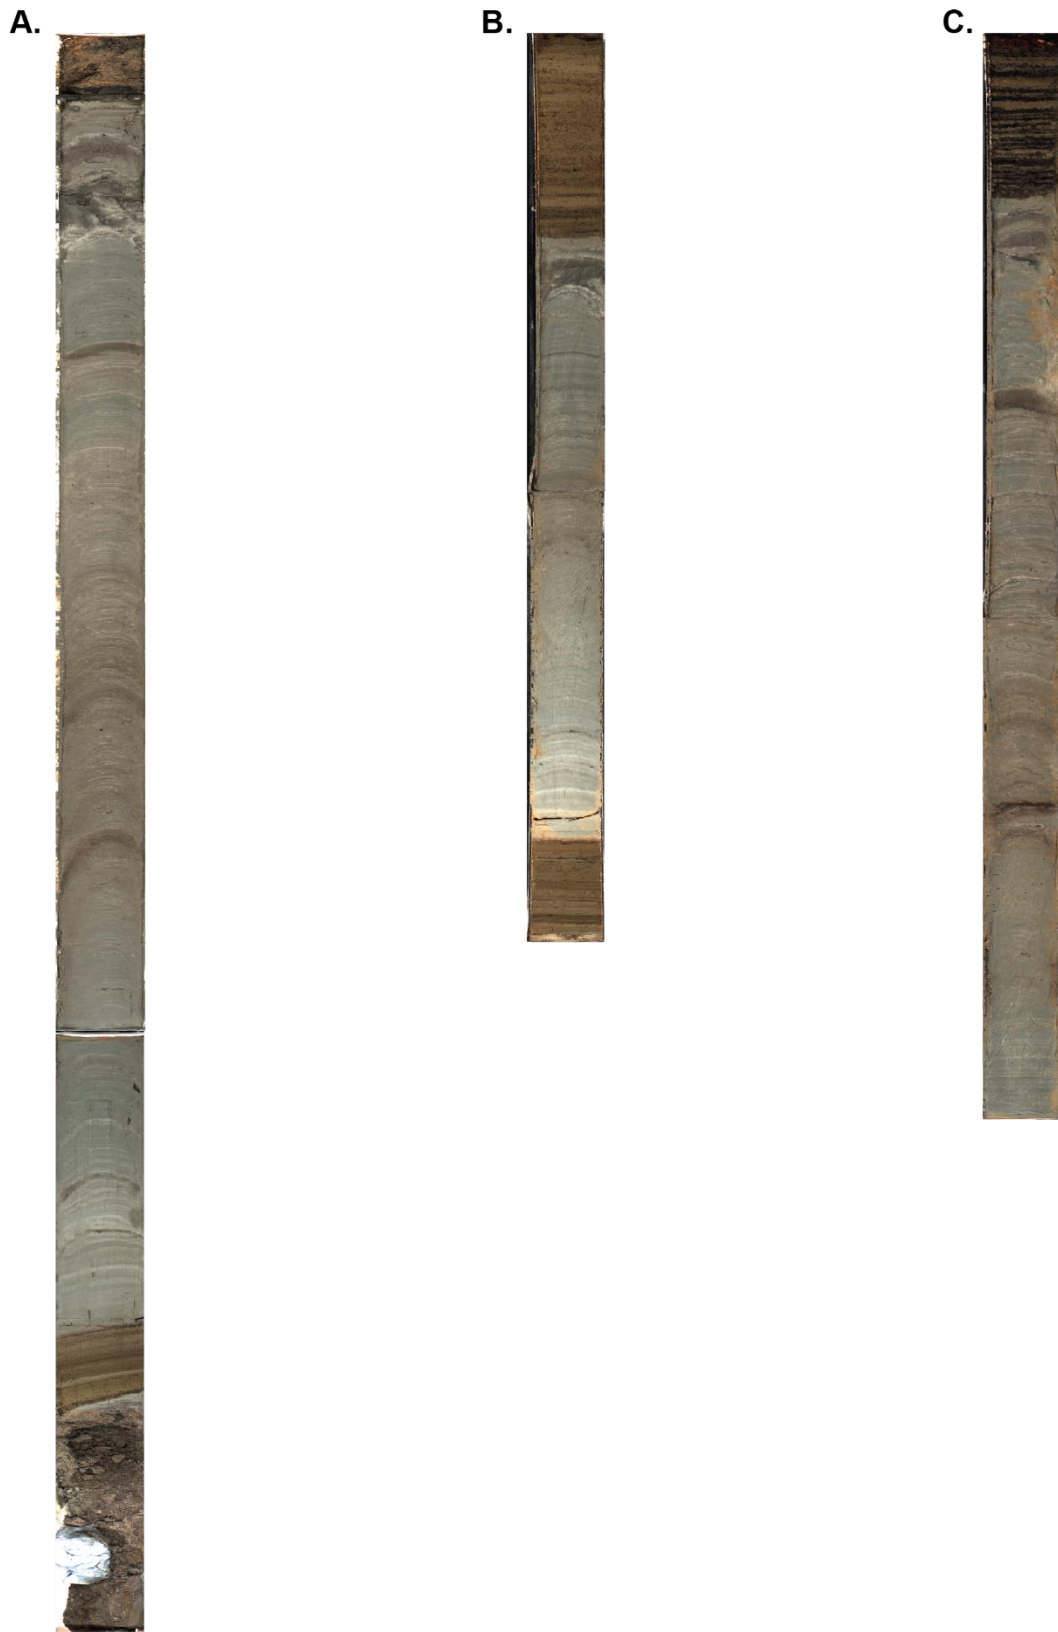

**Figure S1** (A) Image of 19-LMEL-N2. (B) Image of 19-LMEL-U11. (C) Image of 19-LMEL-U5.

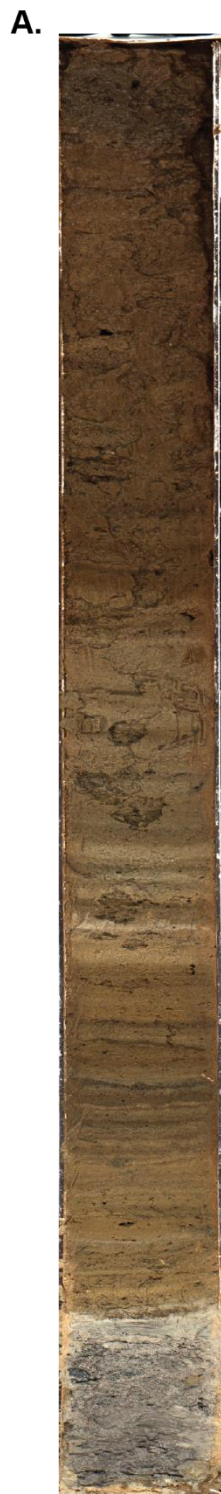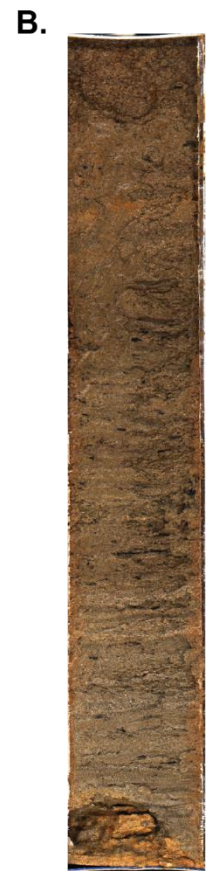

**Figure S2** (A) Image of 19-UMEL-U2. (B) Image of 19-UMEL-U1.
